# Supplementary material for: Structure and solubility behaviour of zinc containing phosphate glasses
Source: Royal Society of Chemistry journal article supplement (doi:10.1039/c4tb01504e), 2015-01-01
Supplement: c4tb01504e1.pdf [file c4tb01504e1.pdf]

## Supplementary Data

---

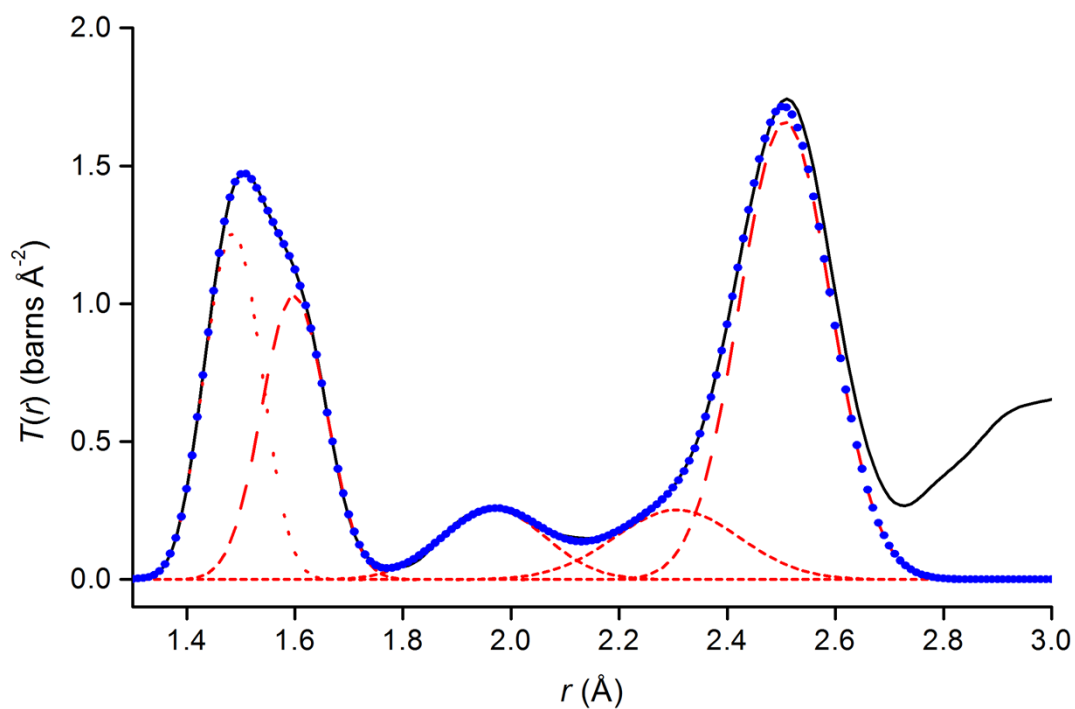

Fig. S1. Fitted total pair distribution function  $T(r)$  (solid line) for the  $x = 0$  composition. The individual pair distribution functions are shown by segmented lines.

---

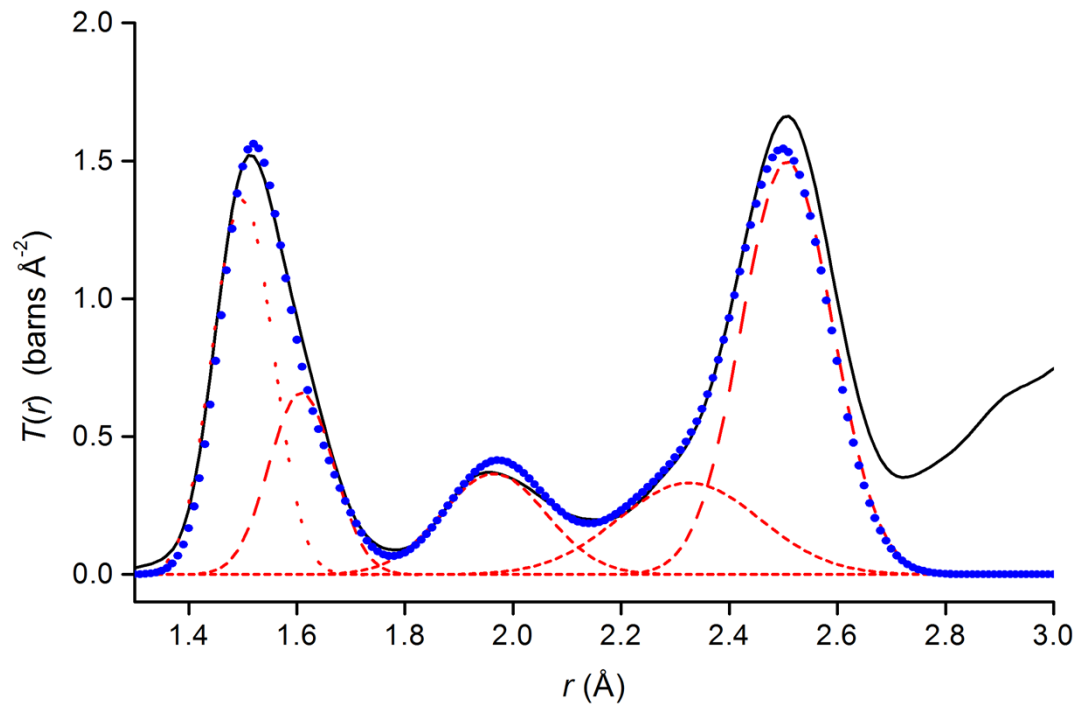

Fig. S2. Fitted total pair distribution function  $T(r)$  (solid line) for the  $x = 10$  composition. The individual pair distribution functions are shown by segmented lines.

---

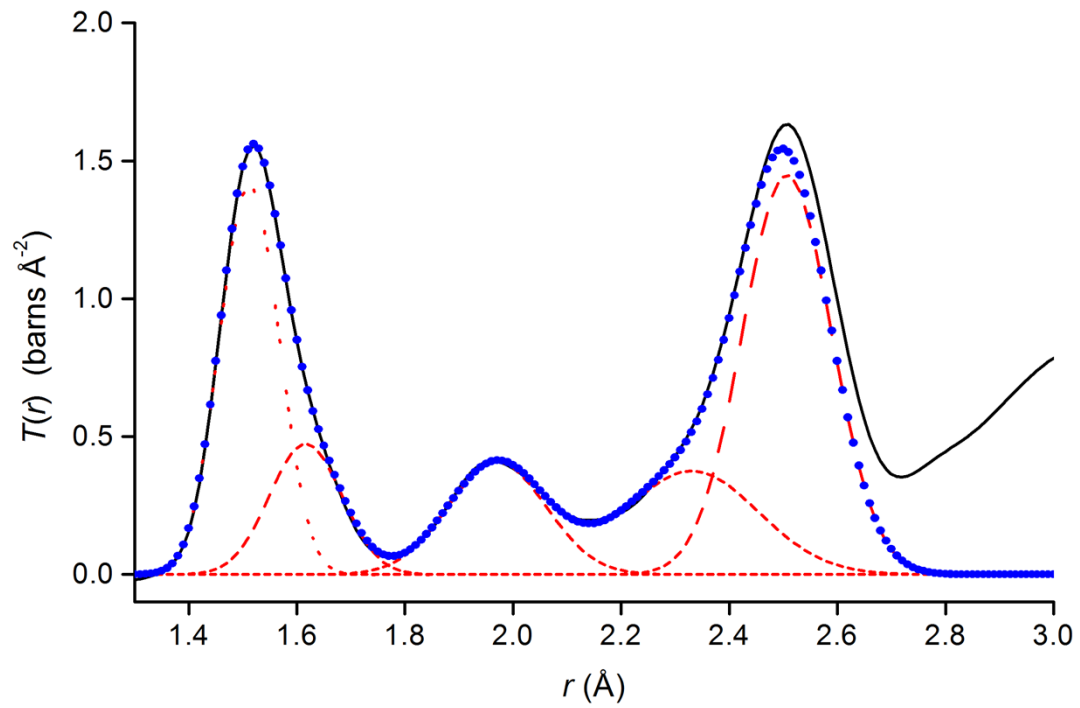

Fig. S3. Fitted total pair distribution function  $T(r)$  (solid line) for the  $x = 15$  composition. The individual pair distribution functions are shown by segmented lines.

---

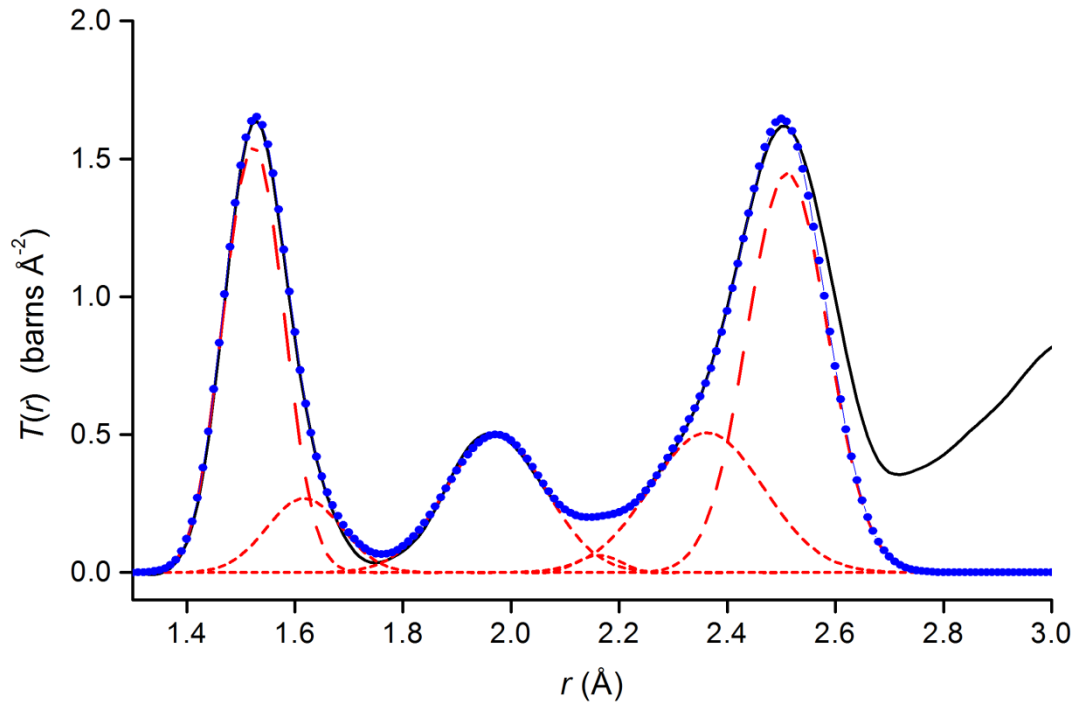

Fig. S4. Fitted total pair distribution function  $T(r)$  (solid line) for the  $x = 20$  composition. The individual pair distribution functions are shown by segmented lines.

---
